# Supplementary material for: Carbon intercalated porous NaTi2(PO4)3spheres as high-rate and ultralong-life anodes for rechargeable sodium-ion batteries
Source: Royal Society of Chemistry journal article supplement (doi:10.1039/c7qm00048k), 2017-01-01
Supplement: c7qm00048k1.pdf [file c7qm00048k1.pdf]

## Carbon intercalated porous $\text{NaTi}_2(\text{PO}_4)_3$ spheres as high-rate and ultralong-life anodes for rechargeable sodium-ion batteries

Hongbo Geng<sup>†a,c</sup>, Jun Yang<sup>†b</sup>, Hong Yu<sup>a</sup>, Chengchao Li<sup>\*a</sup>, and Xiaochen Dong<sup>\*b</sup>

<sup>a</sup>School of Chemical Engineering and Light Industry, Guangdong University of Technology, Guangzhou 510006, China.

E-mail: licc@gdut.edu.cn

<sup>b</sup>Key Laboratory of Flexible Electronics (KLOFE) & Institute of Advanced Materials (IAM), Jiangsu National Synergetic Innovation Center for Advanced Materials (SICAM), Nanjing Tech University (NanjingTech), 30 South Puzhu Road, Nanjing 211816, China.

E-mail: iamxcdong@njtech.edu.cn

<sup>c</sup>Key Laboratory of Organic Synthesis of Jiangsu Province, College of Chemistry, Chemical Engineering and Materials Science and Collaborative Innovation Center of Suzhou Nano Science and Technology, Soochow University, Suzhou, 215123, P. R. China.

† These authors contribute equally

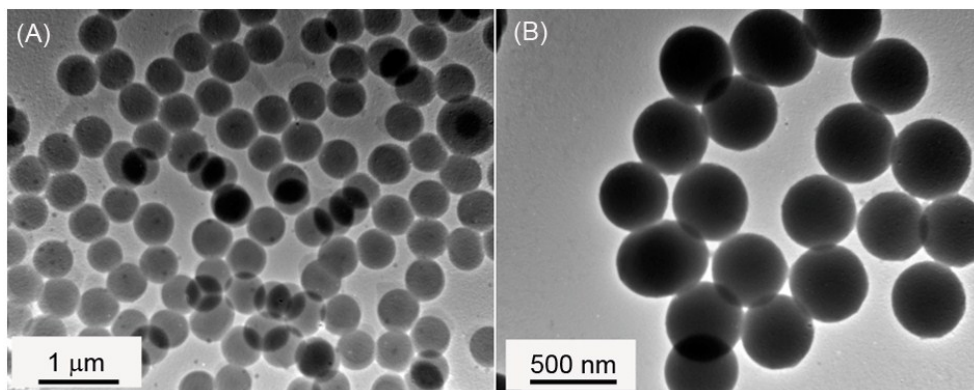

**Fig. S1** (A, B) TEM images of the titanium glycolate precursor spheres.

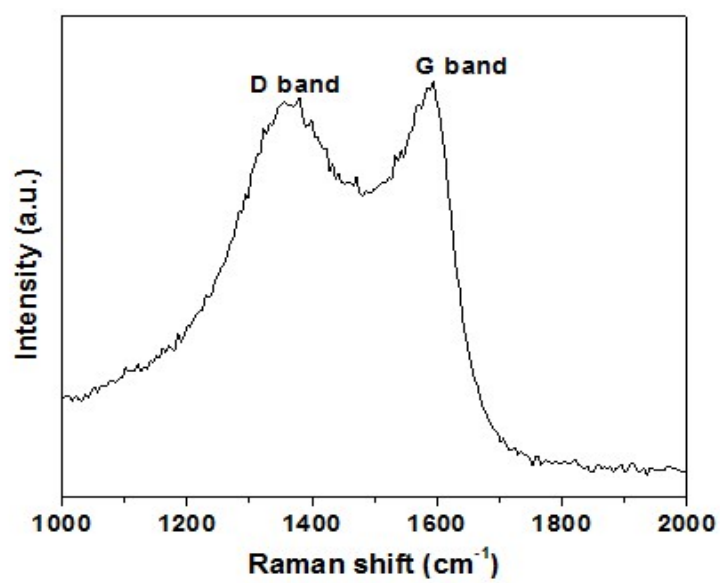

**Fig. S2** Raman spectra of porous NTP@C spheres.

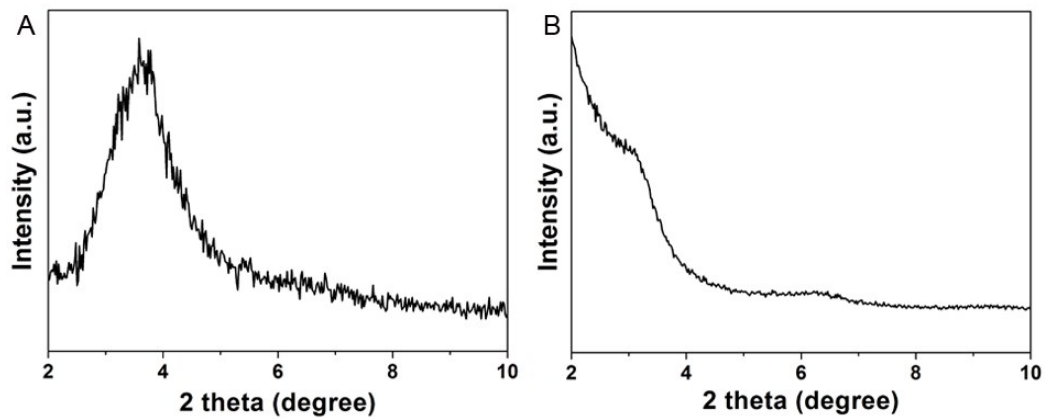

**Fig. S3** Small-angle XRD patterns for the (A) NTP-precursor and (B) porous NTP@C spheres.

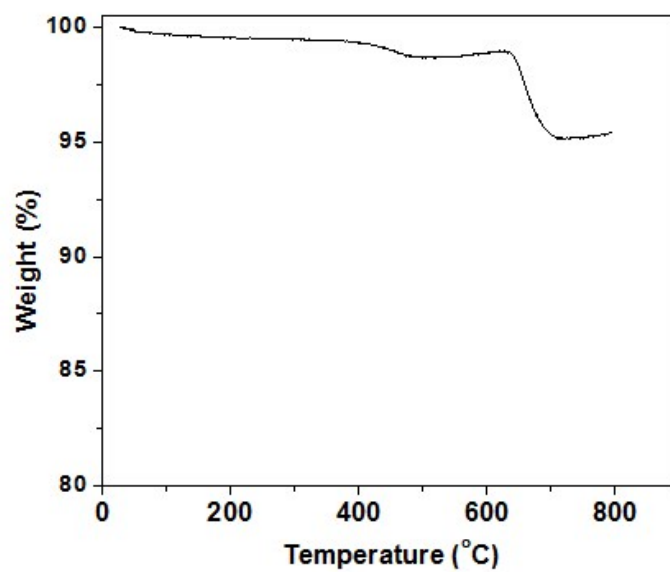

**Fig. S4** TGA curve of the porous NTP@C spheres.

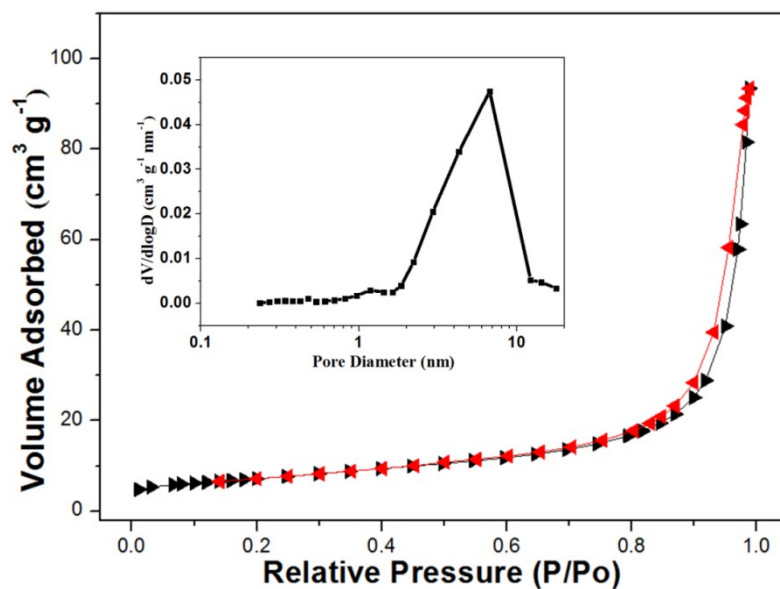

**Fig. S5** N<sub>2</sub> adsorption-desorption isotherms of porous NTP@C spheres (Inset is the corresponding Barrett-Joyner-Halenda (BJH) pore size distribution curve).

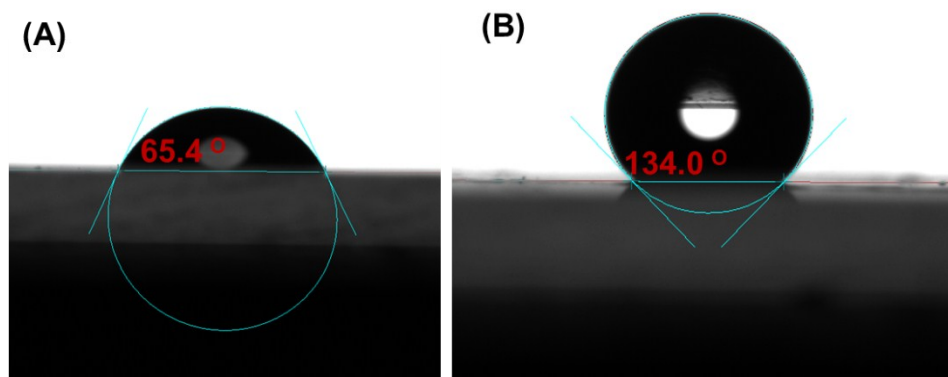

**Fig. S6** Dynamic water contact angle measurement for (A) the porous NTP@C spheres, (B) pure NTP. The image was captured when the water droplet rests on the surface and stopped at 10 s or longer until no change in droplet size.

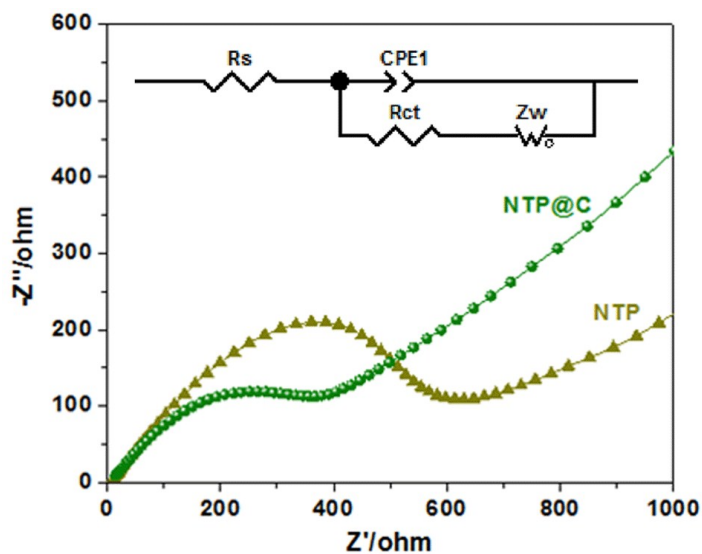

**Fig. S7** Nyquist plots of the pure NTP and the porous NTP@C spheres and the corresponding fitted equivalent circuit model (inset).

**Table S1:** Atomic parameters of the porous NTP@C spheres refined from XRD. NASICON-type structure in space group R-3c. Cell parameters:  $a = 8.4830 \text{ \AA}$ ,  $c = 21.8043 \text{ \AA}$ ,  $R_{wp} = 6.51 \%$ ,  $V = 1358.88 \text{ \AA}^3$ ,  $S = 2.96$ .

| Atom | Wyck. site | x      | y      | z      |
|------|------------|--------|--------|--------|
| Na   | 6b         | 0      | 0      | 0      |
| Ti   | 12c        | 0      | 0      | 0.1453 |
| P    | 18e        | 0.2891 | 0      | 0.2500 |
| O1   | 36f        | 0.1724 | 0.2980 | 0.1932 |
| O2   | 36f        | 0.1922 | 0.1637 | 0.0890 |
